# Supplementary material
Source: publisher site journal article supplement (https://static.cambridge.org/content/id/urn:cambridge.org:id:article:S136898002000292X/resource/name/S136898002000292Xsupp002.docx)
Supplement: Supplementary file 1 [file S136898002000292Xsupp002.docx]

Appendix 1. Sample construction flow chart, National Health and Nutrition Survey 2012, Mexico

**Abbreviations**: NHNS=National Health and Nutrition Survey 2012, HFI= Household food insecurity

n=58 (1.1%) households were excluded because of missing HFI data

**Analytic sample=4,706** mother-child dyads

4,764 mothers had anthropometric data. These were matched to their household information.

n=156 mothers

mothers excluded because they were not in the age range of interest

n=333 (3.1%) children were excluded because their mothers did not live in the household (n=312), died (n=12), or response was “Don’t know” (n=9). This resulted in n=10,325 children

10,169 of the matched mothers were in the age range of interest (12 to 49 years of age)

10,325 children were matched to their mothers. No mother had more than one child in between 0 and 59 months.

n=5,405 mothers were excluded because they did not have anthropometric data

Households with children 0 to 59 months with anthropometric data (21%) =10,658

NHNS 2012 total sample= 50,528 households
